# Supplementary material for: Residential Buildings’ Real Estate Values Linked to Summer Surface Thermal Anomaly Patterns and Urban Features: A Florence (Italy) Case Study
Source: MDPI journal article supplement (doi:10.3390/su14148412), 2022-07-08
Supplement: s1 [file s1]

Article

# Residential Buildings' Real Estate Values Linked to Summer Surface Thermal Anomaly Patterns and Urban Features: A Florence (Italy) Case Study

Giulia Guerri <sup>1</sup>, Alfonso Crisci <sup>1</sup>, Irene Cresci <sup>2</sup>, Luca Congedo <sup>3</sup>, Michele Munafò <sup>3</sup>, Marco Morabito <sup>1,4,\*</sup>

<sup>1</sup> Institute of Bioeconomy (IBE), National Research Council, 50019 Florence, Italy;

giulia.guerri@ibe.cnr.it (G.G.); alfonso.crisci@ibe.cnr.it (A.C.)

<sup>2</sup> MSc Environmental Sciences, Wageningen University and Research, Droevendaalsesteeg 4, 6708 PB Wageningen, The Netherlands; irene.cresci@wur.nl

<sup>3</sup> Italian National Institute for Environmental Protection and Research (ISPRA), 00144 Rome, Italy; luca.congedo@isprambiente.it (L.C.); michele.munafò@isprambiente.it (M.M.)

<sup>4</sup> Centre of Bioclimatology (CIBIC), University of Florence, 50144 Florence, Italy

\* Correspondence: marco.morabito@cnr.it; Tel.: +39-055-5226041

## Supplementary materials

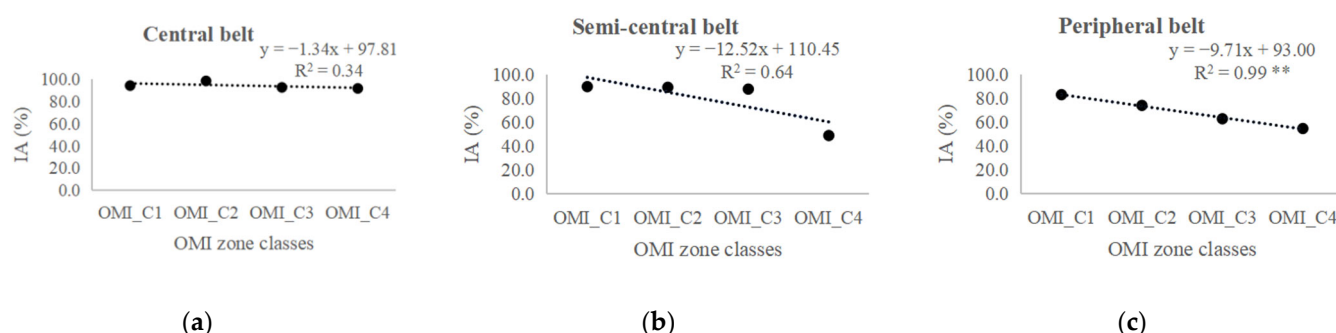

**Figure S1.** Impervious area (IA) according to four OMI zone classes (from OMI\_C1 to OMI\_C4) for three different urban belts: central (a), semi-central (b), and peripheral (c).

Note: Significant levels: \*\* p-value < 0.01.

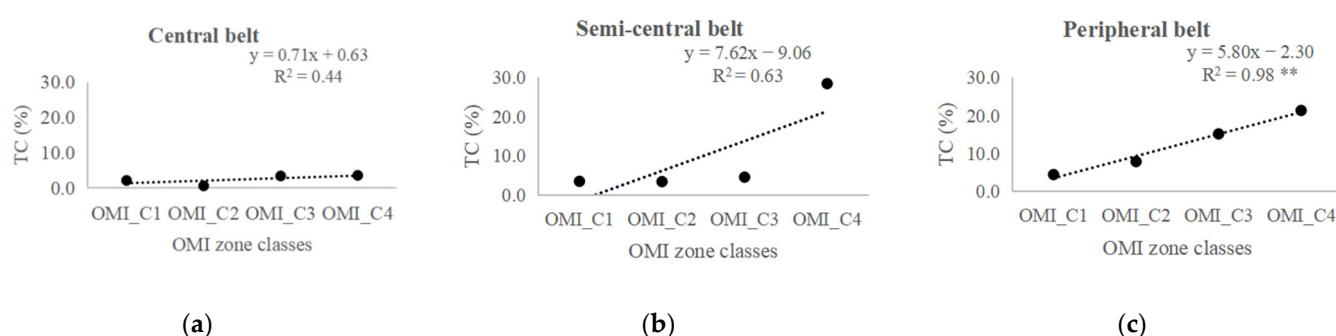

**Figure S2.** Tree cover (TC) according to four OMI zone classes (from OMI\_C1 to OMI\_C4) for three different urban belts: central (a), semi-central (b), and peripheral (c).

Note: Significant levels: \*\* p-value < 0.01.

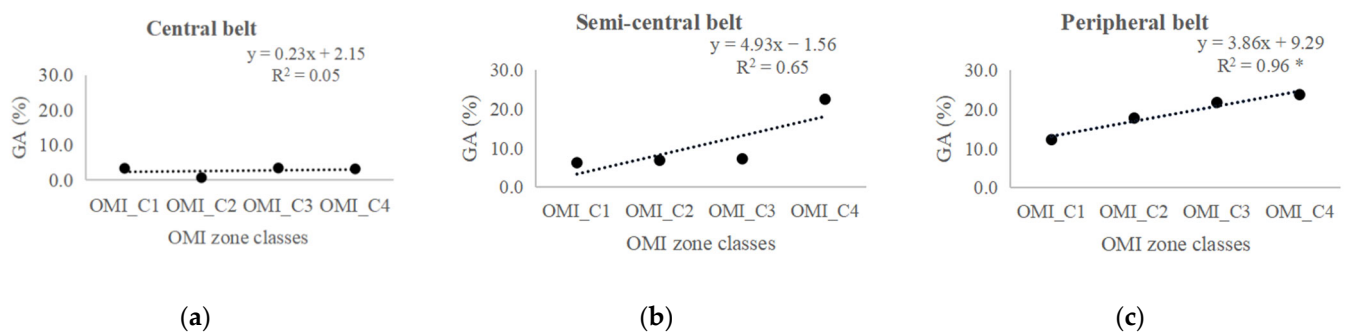

**Figure S3.** Grassland area (GA) according to four OMI zone classes (from OMI\_C1 to OMI\_C4) for three different urban belts: central (a), semi-central (b), and peripheral (c).

Note: Significant levels: \* p-value < 0.05.

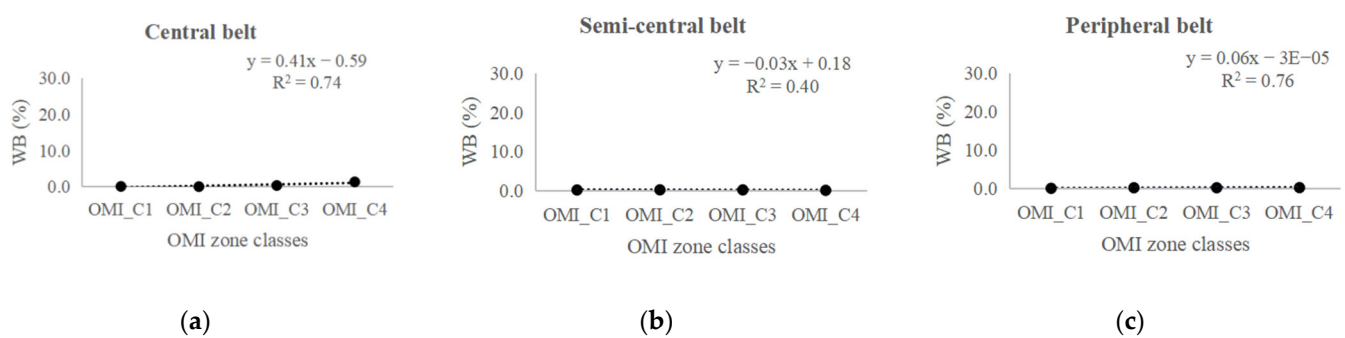

**Figure S4.** Water bodies (WB) according to four OMI zone classes (from OMI\_C1 to OMI\_C4) for three different urban belts: central (a), semi-central (b), and peripheral (c).

**Table S1.** Comparisons between surface urban features in two buffer areas (calculated with a radius of 50 m and 100 m) surrounding residential buildings in the three different OMI belts (central, semi-central and peripheral).

| OMI belts    | OMI_C          | Surface urban features in two buffer areas (50 m and 100 m) |                 |                 |                 |                 |                 |                 |                 |                 |                 |
|--------------|----------------|-------------------------------------------------------------|-----------------|-----------------|-----------------|-----------------|-----------------|-----------------|-----------------|-----------------|-----------------|
|              |                | Mean $\pm$ standard deviation                               |                 |                 |                 |                 |                 |                 |                 |                 |                 |
|              |                | LST (°C)                                                    |                 | IA (%)          |                 | TC (%)          |                 | GA (%)          |                 | WB (%)          |                 |
|              |                | 50 m<br>buffer                                              | 100 m<br>buffer | 50 m<br>buffer  | 100 m<br>buffer | 50 m<br>buffer  | 100 m<br>buffer | 50 m<br>buffer  | 100 m<br>buffer | 50 m<br>buffer  | 100 m<br>buffer |
| Central      | OMI_C1         | 36.8 $\pm$ 0.8                                              | 36.8 $\pm$ 0.8  | 94.4 $\pm$ 7.1  | 93.5 $\pm$ 5.7  | 2.1 $\pm$ 3.7   | 2.6 $\pm$ 3.2   | 3.4 $\pm$ 4.4   | 3.8 $\pm$ 3.3   | 0.1 $\pm$ 0.6   | 0.1 $\pm$ 0.7   |
|              | OMI_C2         | 38.2 $\pm$ 0.6                                              | 38.1 $\pm$ 0.5  | 98.7 $\pm$ 4.0  | 98.1 $\pm$ 3.9  | 0.6 $\pm$ 1.9   | 0.7 $\pm$ 1.7   | 0.7 $\pm$ 2.4   | 0.9 $\pm$ 1.9   | <0.01 $\pm$ 0.2 | 0.2 $\pm$ 1.6   |
|              | OMI_C3         | 36.9 $\pm$ 1.1                                              | 36.7 $\pm$ 1.1  | 92.8 $\pm$ 10.6 | 88.9 $\pm$ 11.7 | 3.4 $\pm$ 6.5   | 4.9 $\pm$ 6.5   | 3.5 $\pm$ 5.3   | 5.1 $\pm$ 5.1   | 0.3 $\pm$ 2.3   | 1.1 $\pm$ 4.7   |
|              | OMI_C4         | 36.6 $\pm$ 1.8                                              | 36.4 $\pm$ 1.9  | 91.9 $\pm$ 15.2 | 87.1 $\pm$ 17.8 | 3.6 $\pm$ 8.7   | 5.0 $\pm$ 9.5   | 3.2 $\pm$ 7.1   | 4.3 $\pm$ 7.3   | 1.3 $\pm$ 5.1   | 3.6 $\pm$ 8.5   |
|              | R <sup>2</sup> | 0.98                                                        |                 | 0.95            |                 | 0.99            |                 | 0.93            |                 | 0.99            |                 |
|              | p-value        | <0.01                                                       |                 | <0.05           |                 | <0.01           |                 | <0.05           |                 | <0.01           |                 |
| Semi-central | OMI_C1         | 36.5 $\pm$ 1.3                                              | 36.4 $\pm$ 1.2  | 90.1 $\pm$ 13.5 | 87.5 $\pm$ 13.8 | 3.5 $\pm$ 6.9   | 4.4 $\pm$ 6.6   | 6.3 $\pm$ 8.3   | 7.7 $\pm$ 8.3   | 0.1 $\pm$ 1.1   | 0.4 $\pm$ 2.5   |
|              | OMI_C2         | 36.1 $\pm$ 1.0                                              | 36.0 $\pm$ 1.0  | 89.6 $\pm$ 13.0 | 86.1 $\pm$ 12.7 | 3.4 $\pm$ 5.8   | 4.5 $\pm$ 5.2   | 6.9 $\pm$ 9.0   | 8.7 $\pm$ 8.4   | 0.2 $\pm$ 1.9   | 0.7 $\pm$ 3.7   |
|              | OMI_C3         | 35.8 $\pm$ 1.3                                              | 35.7 $\pm$ 1.2  | 88.0 $\pm$ 14.6 | 85.0 $\pm$ 14.3 | 4.5 $\pm$ 7.6   | 5.9 $\pm$ 7.5   | 7.3 $\pm$ 9.1   | 8.9 $\pm$ 8.7   | 0.1 $\pm$ 0.8   | 0.2 $\pm$ 0.7   |
|              | OMI_C4         | 32.7 $\pm$ 1.7                                              | 32.5 $\pm$ 1.6  | 48.9 $\pm$ 23.8 | 40.6 $\pm$ 22.6 | 28.5 $\pm$ 18.8 | 33.8 $\pm$ 17.3 | 22.6 $\pm$ 14.3 | 25.6 $\pm$ 14.6 | <0.1 $\pm$ 0.3  | <0.1 $\pm$ 0.3  |
|              | R <sup>2</sup> | 0.99                                                        |                 | 0.99            |                 | 0.99            |                 | 0.99            |                 | 0.55            |                 |
|              | p-value        | <0.001                                                      |                 | <0.001          |                 | <0.001          |                 | <0.001          |                 | 0.260           |                 |
| Peripheral   | OMI_C1         | 36.2 $\pm$ 1.0                                              | 36.1 $\pm$ 1.0  | 83.2 $\pm$ 15.6 | 77.8 $\pm$ 15.1 | 4.4 $\pm$ 7.2   | 6.4 $\pm$ 6.9   | 12.3 $\pm$ 11.8 | 15.7 $\pm$ 11.0 | <0.1 $\pm$ 0.4  | 0.1 $\pm$ 0.8   |
|              | OMI_C2         | 35.7 $\pm$ 1.6                                              | 35.6 $\pm$ 1.6  | 74.2 $\pm$ 22.0 | 68.6 $\pm$ 22.3 | 7.9 $\pm$ 11.5  | 9.4 $\pm$ 11.3  | 17.8 $\pm$ 14.9 | 21.6 $\pm$ 14.9 | 0.2 $\pm$ 1.8   | 0.4 $\pm$ 2.6   |
|              | OMI_C3         | 34.4 $\pm$ 2.3                                              | 34.3 $\pm$ 2.3  | 62.9 $\pm$ 29.0 | 56.3 $\pm$ 30.9 | 15.2 $\pm$ 17.7 | 18.1 $\pm$ 18.5 | 21.8 $\pm$ 18.1 | 25.3 $\pm$ 18.7 | 0.2 $\pm$ 1.2   | 0.3 $\pm$ 2.1   |
|              | OMI_C4         | 33.2 $\pm$ 1.9                                              | 33.0 $\pm$ 1.8  | 54.6 $\pm$ 26.0 | 45.3 $\pm$ 25.2 | 21.4 $\pm$ 17.2 | 25.8 $\pm$ 16.3 | 23.8 $\pm$ 17.0 | 28.6 $\pm$ 17.6 | 0.2 $\pm$ 1.3   | 0.3 $\pm$ 1.1   |
|              | R <sup>2</sup> | 0.99                                                        |                 | 0.99            |                 | 0.99            |                 | 0.99            |                 | 0.80            |                 |
|              | p-value        | <0.001                                                      |                 | <0.01           |                 | <0.01           |                 | <0.01           |                 | 0.105           |                 |

Note: OMI\_C is referred to the OMI zone classes (going from OMI\_C1 to OMI\_C4 with the lowest to the highest residential building real estate values, respectively).
